# Supplementary material for: Intelligent multiple-liquid evaporation power generation platform using distinctive Jaboticaba-like carbon nanosphere@TiO2 nanowires
Source: Royal Society of Chemistry journal article supplement (doi:10.1039/c8ta12328d), 2019-01-01
Supplement: c8ta12328d1.pdf [file c8ta12328d1.pdf]

## Supporting Information

### Intelligent multiple liquid evaporation power generation platform using distinctive Jaboticaba-like Carbon nanosphere@TiO<sub>2</sub> nanowire

Bingxue Ji<sup>1</sup>, Nan Chen<sup>\*,1</sup>, Changxiang Shao<sup>1</sup>, Qianwen Liu<sup>1</sup>, Jian Gao<sup>1</sup>,  
Tong Xu<sup>1</sup>, Huhu Cheng<sup>2</sup>, Liangti Qu<sup>\*,1,2</sup>

1 Key Laboratory of Photoelectric/Electrophotonic Conversion Materials, Key Laboratory of Cluster Science, Ministry of Education of China, School of Chemistry and Chemical Engineering, Beijing Institute of Technology, Beijing 100081, P. R. China.

2 Key Laboratory for Advanced Materials Processing Technology, Ministry of Education of China; State Key Laboratory of Tribology, Department of Chemistry, Tsinghua University, Beijing 100084, PR China.

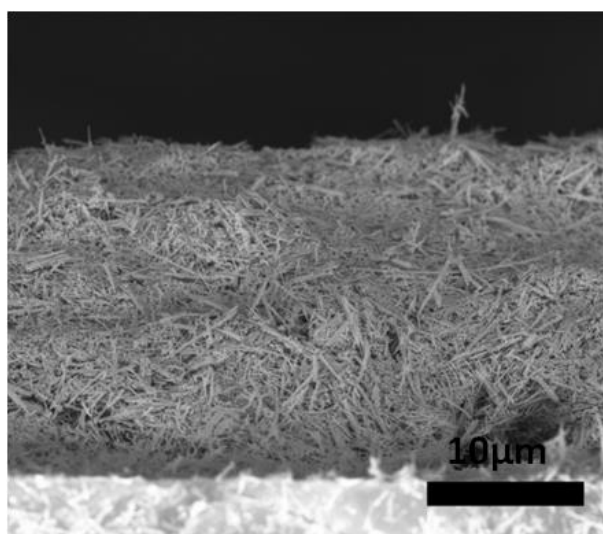

**Figure S1.** Cross-section SEM image of C@T.

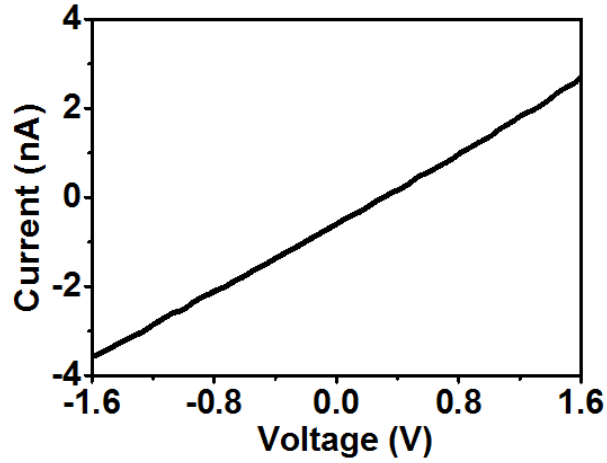

**Figure S2.** Current-voltage curves of EPG devices. The linearity of the curves indicates a good ohmic contact between the C@T and the carbon paste electrodes.

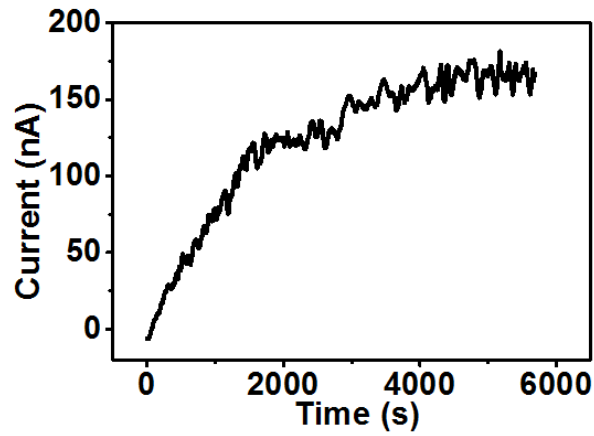

**Figure S3.** FIC by water-evaporation induced under normal pressure and 25°C.

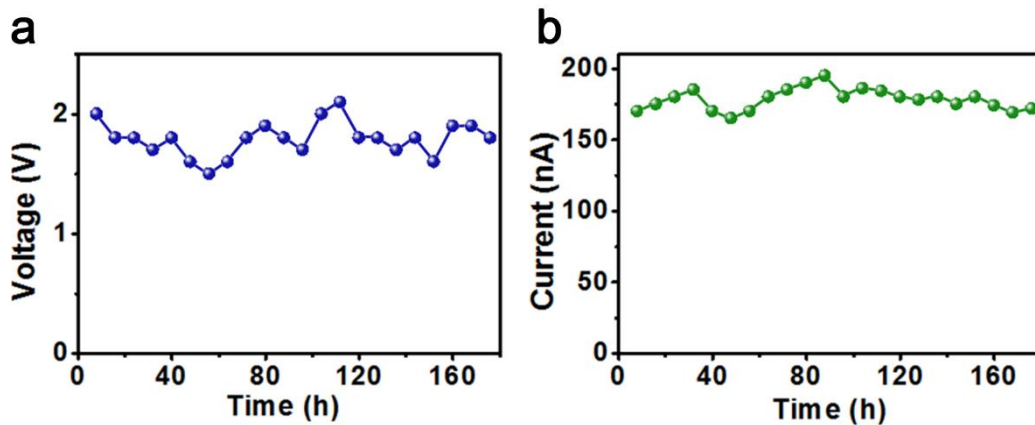

**Figure S4.** The long term stability of FIV (a) and FIC (b).

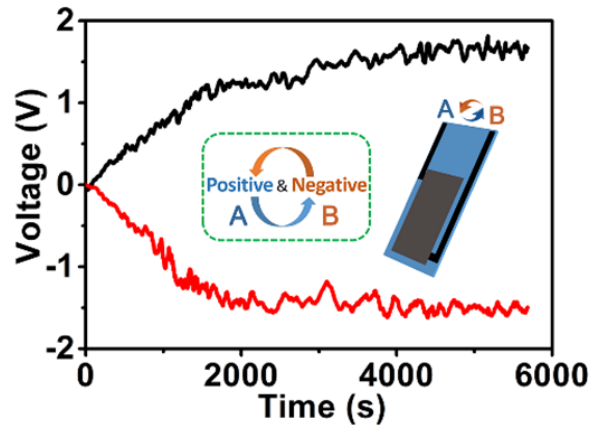

**Figure S5.** Effect of electrodes interchange on FIV.

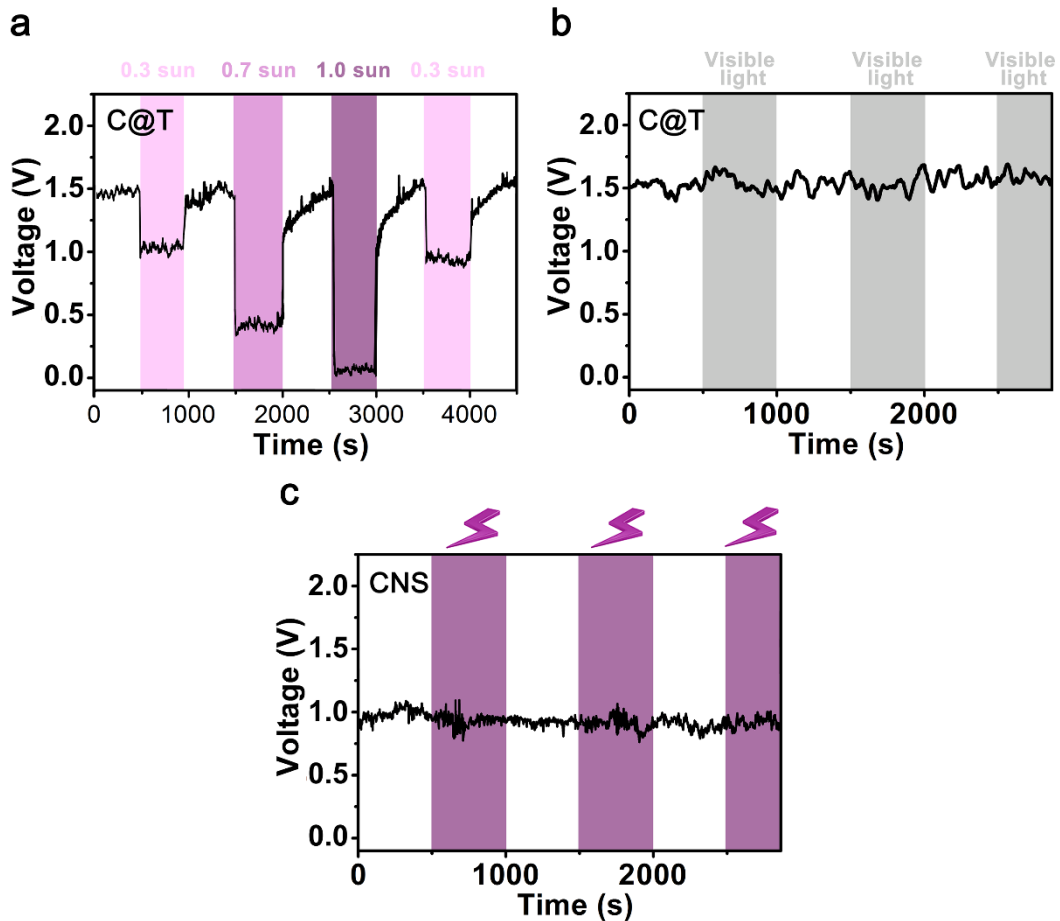

**Figure S6.** (a) The influence of simulated solar irradiation on the FIV using C@T (light intensity from left to right: 0.3 sun, 0.7 sun, 1 sun, and 0.3 sun). (b) The FIV using C@T under visible light. (c) The effect of simulated solar irradiation on FIV using CNS, the FIV did not change under UV-containing simulated solar irradiation (1 sun).

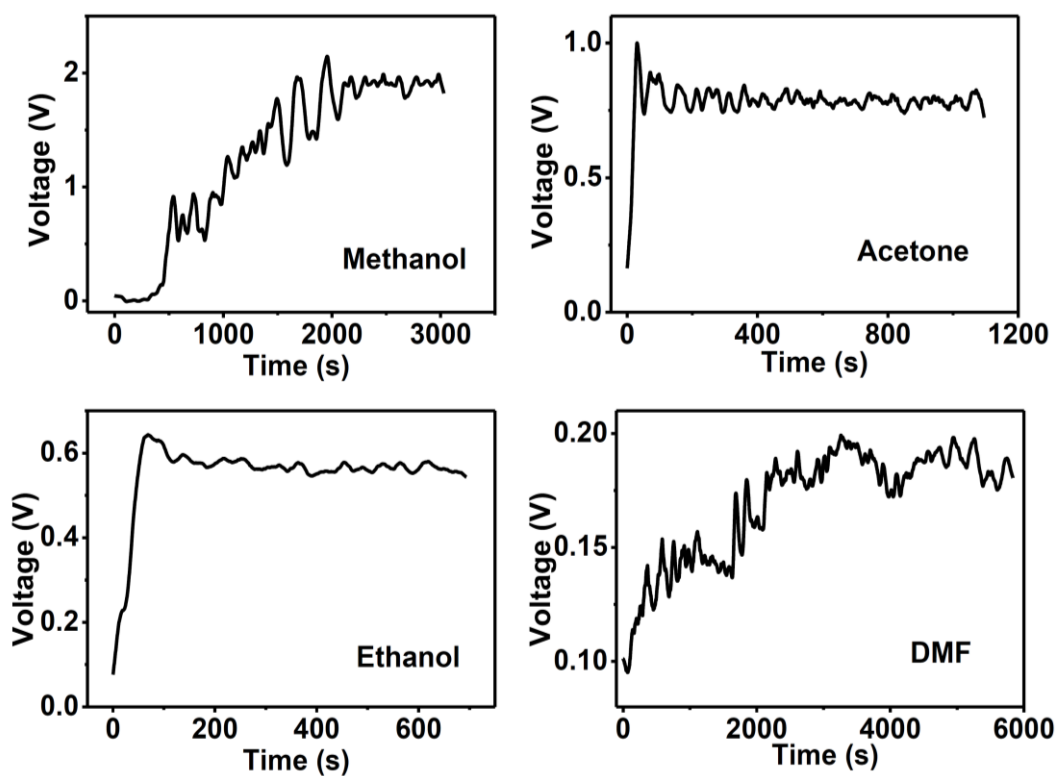

**Figure S7.** The FIV curves of the EPG device using different liquids.

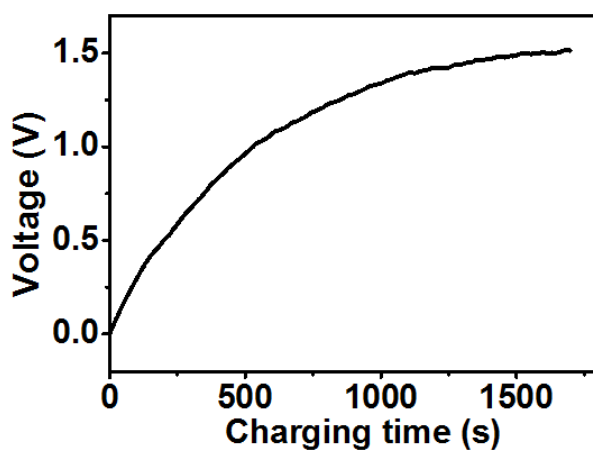

**Figure S8.** Charging curve for 100  $\mu\text{F}$  capacitors connected to an EPG device.

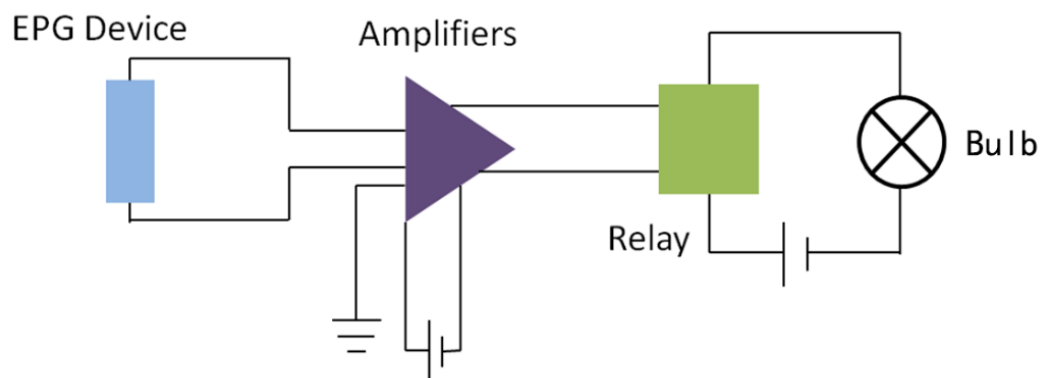

**Figure S9.** A circuit of light-control switch that is composed of EPG device, bulb, amplifiers and an electric relay. The ON/OFF states of bulb can be controlled by changes in external light intensity.
